# Supplementary material for: Phylogenetic and Morphologic Analyses of a Coastal Fish Reveals a Marine Biogeographic Break of Terrestrial Origin in the Southern Caribbean
Source: PLoS One. 2010 Jul 13;5(7):e11566. doi: 10.1371/journal.pone.0011566 (PMC2903491; doi:10.1371/journal.pone.0011566)
Supplement: Table S1 — Molecular material examined and GenBank accession numbers for the Cathorops mapale group. Locality codes follow Fig. 1; two letter country codes follow ISO-3166. See Betancur-R. (2009) for details on outgroup (non-Cathorops mapale group) material. (0.02 MB XLS) [file pone.0011566.s001.xls]

## Sheet: Appendix S1
Species/Voucher No.	Collection No.	Locality	Locality code	GenBank Accession No.	Reference
Cathorops agassizii/stri-x3541	MHNG 2608.097	GF	N/A	DQ990645, DQ990473	Betancur-R. (2007)
Cathorops fuerthii/stri-17563	STRI-5720	PA	N/A	DQ990641, DQ990469	Betancur-R. (2007)
Cathorops aff. fuerthii/stri-15949	STRI-5726	SV	N/A	DQ990640, DQ990468	Betancur-R. (2007)
Cathorops cf. higuchii/oto4	MNHN-ICOT-001583	NI	N/A	FJ625870, FJ626163	Betancur-R. (2009)
Cathorops manglarensis/526	INVEMAR-PEC (NCA)	CO	N/A	FJ625871, FJ626164	Betancur-R. (2009)
Cathorops mapale/			N/A
stri-x3601	INVEMAR-PEC 5348 (vouch. 548)	Mouth of Río Atrato, Urabá, CO	UR1	AY575017, AY575019, AY575020	Betancur-R. (2005)
stri-x3621	INVEMAR-PEC 5347 (vouch. 540)	Mouth of Río Atrato, Urabá, CO	UR1	GU004537, GU004538	This study
PNG170	NV	Cartagena, CO	CT	GQ982423, GQ982453	This study
PNG171	NV	Cartagena, CO	CT	GQ982424, GQ982454	This study
CO0616	NV	Cartagena, CO	CT	GQ982425, GQ982455	This study
CO0617	NV	Cartagena, CO	CT	GQ982426, GQ982456	This study
stri-x3600	INVEMAR-PEC 5333 (vouch. 58)	Ciénaga Grande de Santa Marta, CO	CG	AY575016, AY575018, AY575021	Betancur-R. (2005)
CO0605	INVEMAR-PEC 7055	Ciénaga Grande de Santa Marta, CO	CG	GQ982413, GQ982443	This study
CO0606	INVEMAR-PEC 7056	Ciénaga Grande de Santa Marta, CO	CG	GQ982414, GQ982444	This study
CO0607	INVEMAR-PEC 7057	Ciénaga Grande de Santa Marta, CO	CG	GQ982415, GQ982445	This study
CO0608	INVEMAR-PEC 7058	Ciénaga Grande de Santa Marta, CO	CG	GQ982416, GQ982446	This study
PNG154	INVEMAR-PEC 7734	Ciénaga Grande de Santa Marta, CO	CG	GQ982417, GQ982447	This study
PNG160	INVEMAR-PEC 7735	Ciénaga Grande de Santa Marta, CO	CG	GQ982418, GQ982448	This study
PNG161	INVEMAR-PEC 7735	Ciénaga Grande de Santa Marta, CO	CG	GQ982419, GQ982449	This study
PNG162	INVEMAR-PEC 7735	Ciénaga Grande de Santa Marta, CO	CG	GQ982420, GQ982450	This study
PNG165	INVEMAR-PEC 7734	Ciénaga Grande de Santa Marta, CO	CG	GQ982421, GQ982451	This study
PNG169	INVEMAR-PEC 7735	Ciénaga Grande de Santa Marta, CO	CG	GQ982422, GQ982452	This study
Cathoropssp./
481	INVEMAR-PEC 5735	Camarones, CO	CM	GQ982427, GQ982457	This study
482	INVEMAR-PEC 5735	Camarones, CO	CM	GQ982428, GQ982458	This study
484	INVEMAR-PEC 5735	Camarones, CO	CM	GQ982429, GQ982459	This study
486	INVEMAR-PEC 5735	Camarones, CO	CM	GQ982430, GQ982460	This study
487	INVEMAR-PEC (NCA)	Camarones, CO	CM	GQ982431, GQ982461	This study
stri-x3661 (494)	INVEMAR-PEC 5734	Riohacha, CO	RH	DQ990470, DQ990642	Betancur-R. (2007)
495	INVEMAR-PEC (NCA)	Riohacha, CO	RH	GQ982432, GQ982462	This study
VEN0544	AUM 42848	Puerto Cabello, VE	PC	GQ982441, GQ982471	This study
VEN0545	AUM 42848	Puerto Cabello, VE	PC	GQ982442, GQ982472	This study
VEN0506	AUM 42758	Isla Margarita, VE	IM	GQ982433, GQ982463	This study
VEN0507	AUM 42758	Isla Margarita, VE	IM	GQ982434, GQ982464	This study
VEN0508	AUM 42758	Isla Margarita, VE	IM	GQ982435, GQ982465	This study
VEN0516	AUM 42846	Carupano (Sucre), VE	CA	GQ982436, GQ982466	This study
VEN0517	AUM 42846	Carupano (Sucre), VE	CA	GQ982437, GQ982467	This study
VEN0526	AUM 44227	Golfo de Paria, VE	GP	GQ982438, GQ982468	This study
VEN0527	AUM 44227	Golfo de Paria, VE	GP	GQ982439, GQ982469	This study
VEN0537	AUM 42760	Golfo de Paria, VE	GP	GQ982440, GQ982470	This study
Cathorops spixii/stri-x3563	ANSP 178744	GY	N/A	DQ990647, DQ990475	Betancur-R. (2007)
NV, not vouchered
NCA, not catatalogued
